# Supplementary material
Source: PubMed Central journal article supplement (PMC6476655)
Supplement: NIHMS1522424-supplement-Supplemental_Material.pdf [file NIHMS1522424-supplement-Supplemental_Material.pdf]

**Supplemental Materials:**

**Table I. Elixhauser AHRQ- Web Comorbidity Definitions**

| Comorbidities            | ICD-9-CM/ AHRQ-Web                                                                    |                                                                                                                                                                                                                                                                                                                                                                                                                                                                                                                                                                                                                                                                                                                                                                                                                                                                                                                                                                                                                                                                                                                                                                                                                                                                                          |
|--------------------------|---------------------------------------------------------------------------------------|------------------------------------------------------------------------------------------------------------------------------------------------------------------------------------------------------------------------------------------------------------------------------------------------------------------------------------------------------------------------------------------------------------------------------------------------------------------------------------------------------------------------------------------------------------------------------------------------------------------------------------------------------------------------------------------------------------------------------------------------------------------------------------------------------------------------------------------------------------------------------------------------------------------------------------------------------------------------------------------------------------------------------------------------------------------------------------------------------------------------------------------------------------------------------------------------------------------------------------------------------------------------------------------|
| Congestive Heart Failure | 398.91, 402.01, 402.11, 402.91, 404.01, 404.03, 404.11, 404.13, 404.91, 404.93, 428.x | <ul style="list-style-type: none"> <li>-Rheumatic heart failure (congestive))</li> <li>-Malignant hypertensive heart disease with heart failure</li> <li>-Benign hypertensive heart disease with heart failure</li> <li>-Unspecified hypertensive heart disease with heart failure</li> <li>-Hypertensive heart and chronic kidney disease, malignant, with heart failure and with chronic kidney disease stage I through stage IV, or unspecified</li> <li>-Hypertensive heart and chronic kidney disease, malignant, with heart failure and with chronic kidney disease stage V or end stage renal disease</li> <li>-Hypertensive heart and chronic kidney disease, benign, with heart failure and with chronic kidney disease stage I through stage IV, or unspecified</li> <li>-Hypertensive heart and chronic kidney disease, benign, with heart failure and chronic kidney disease stage V or end stage renal disease</li> <li>-Hypertensive heart and chronic kidney disease, unspecified, with heart failure and with chronic kidney disease stage I through stage IV, or unspecified</li> <li>-Hypertensive heart and chronic kidney disease, unspecified, with heart failure and chronic kidney disease stage V or end stage renal disease</li> <li>- Heart Failure</li> </ul> |
| Valvular Diseases        | 093.2, 394.x-397.1, 397.9, 424.x, 746.3-746.6, V42.2, V43.3                           | <ul style="list-style-type: none"> <li>-Syphilitic endocarditis</li> <li>- Diseases of mitral valve: mitral stenosis, rheumatic mitral insufficiency, mitral stenosis with insufficiency, other and unspecified mitral valve diseases</li> <li>- Disease of aortic valve: rheumatic aortic stenosis, rheumatic aortic insufficiency, rheumatic aortic stenosis with insufficiency, other and unspecified rheumatic aortic diseases</li> <li>- Disease of mitral and aortic valves: Mitral valve stenosis and aortic valve stenosis, mitral valve stenosis and aortic valve insufficiency, mitral valve insufficiency and aortic valve stenosis, mitral valve insufficiency and aortic valve</li> </ul>                                                                                                                                                                                                                                                                                                                                                                                                                                                                                                                                                                                   |

|                                 |                                                              |                                                                                                                                                                                                                                                                                                                                                                                                                                                                                                                                                                                                                                                                                                                                                                                                                                                                                 |
|---------------------------------|--------------------------------------------------------------|---------------------------------------------------------------------------------------------------------------------------------------------------------------------------------------------------------------------------------------------------------------------------------------------------------------------------------------------------------------------------------------------------------------------------------------------------------------------------------------------------------------------------------------------------------------------------------------------------------------------------------------------------------------------------------------------------------------------------------------------------------------------------------------------------------------------------------------------------------------------------------|
|                                 |                                                              | <p>insufficiency, multiple involvement of mitral and aortic valves, mitral and aortic valve disease, unspecified.</p> <ul style="list-style-type: none"> <li>-Rheumatic diseases of pulmonary valve</li> <li>- Rheumatic disease of endocardium, valve unspecified.</li> <li>-Other diseases of endocardium: mitral valve disorders, aortic valve disorders, tricuspid valve disorders, specified as nonrheumatic, pulmonary valve disorders, endocarditis, valve unspecified, unspecified cause, endocarditis in diseases classified elsewhere, other endocarditis, valve unspecified.</li> <li>- Congenital stenosis of aortic valve</li> <li>-Congenital insufficiency of aortic valve</li> <li>-Congenital mitral stenosis</li> <li>-Congenital mitral insufficiency</li> <li>- Heart Valve replaced by transplant</li> <li>-Heart Valve replaced by other means</li> </ul> |
| Pulmonary Circulation Disorders | 416.x, 417.9                                                 | <ul style="list-style-type: none"> <li>- Chronic pulmonary heart disease: <ul style="list-style-type: none"> <li>Primary pulmonary hypertension</li> <li>Kyphoscoliotic heart disease</li> <li>Chronic pulmonary embolism</li> <li>Other chronic pulmonary heart diseases</li> <li>Chronic pulmonary heart disease, unspecified</li> </ul> </li> <li>-Unspecified disease of pulmonary circulation</li> </ul>                                                                                                                                                                                                                                                                                                                                                                                                                                                                   |
| Peripheral Vascular Disorders   | 440.x, 441.x, 442.x, 443.1-443.9, 447.1, 557.1, 557.9, V43.4 | <ul style="list-style-type: none"> <li>-Atherosclerosis</li> <li>-Aortic aneurysm and dissection</li> <li>-Other aneurysm</li> <li>-Thromboangiitis obliterans, other arterial dissection, other specified peripheral vascular diseases, peripheral vascular disease, unspecified</li> <li>-Stricture of artery</li> <li>- Chronic vascular insufficiency of intestine</li> <li>- Unspecified vascular insufficiency of intestine</li> <li>- Blood vessels replaced by other means</li> </ul>                                                                                                                                                                                                                                                                                                                                                                                   |
| Coagulopathy                    | 286.x, 287.1, 287.3-287.5                                    | <ul style="list-style-type: none"> <li>-Coagulation defects</li> <li>-Qualitative platelet defects</li> <li>-Primary thrombocytopenia</li> <li>-Secondary thrombocytopenia</li> <li>-Thrombocytopenia, unspecified</li> </ul>                                                                                                                                                                                                                                                                                                                                                                                                                                                                                                                                                                                                                                                   |
| Lymphoma                        | 200.x-202.3, 202.5-203.0, 203.8, 238.6, 273.3                | -Lymphosarcoma and reticulosarcoma and other specified malignant tumors of lymphatic tissue                                                                                                                                                                                                                                                                                                                                                                                                                                                                                                                                                                                                                                                                                                                                                                                     |

|               |                                                                                                        |                                                                                                                                                                                                                                                                                                                                                                                                                                                                                                                                                                                                                                                                                                                                                                                                                                                                                                                                                                                                                                                                                                                                                                                                                                                                                                                                                                                                                                                                                            |
|---------------|--------------------------------------------------------------------------------------------------------|--------------------------------------------------------------------------------------------------------------------------------------------------------------------------------------------------------------------------------------------------------------------------------------------------------------------------------------------------------------------------------------------------------------------------------------------------------------------------------------------------------------------------------------------------------------------------------------------------------------------------------------------------------------------------------------------------------------------------------------------------------------------------------------------------------------------------------------------------------------------------------------------------------------------------------------------------------------------------------------------------------------------------------------------------------------------------------------------------------------------------------------------------------------------------------------------------------------------------------------------------------------------------------------------------------------------------------------------------------------------------------------------------------------------------------------------------------------------------------------------|
|               |                                                                                                        | <ul style="list-style-type: none"> <li>-Hodgkin's disease</li> <li>-Nodular Lymphoma, Mycosis fungoides</li> <li>-Sézary's disease</li> <li>-Malignant histiocytosis</li> <li>-Letterer-Siwe disease</li> <li>-Malignant mast cell tumors</li> <li>-Peripheral T-cell lymphoma</li> <li>-Other malignant lymphomas</li> <li>-Other and unspecified malignant neoplasms of lymphoid and histiocytic tissue</li> <li>-Multiple myeloma</li> <li>-Other immunoproliferative neoplasms</li> <li>-Neoplasm of uncertain behavior of plasm cells</li> <li>-Macroglobulinemia</li> </ul>                                                                                                                                                                                                                                                                                                                                                                                                                                                                                                                                                                                                                                                                                                                                                                                                                                                                                                          |
| Renal Failure | 403.01, 403.11, 403.91, 404.02, 404.03, 404.12, 404.13, 404.92, 404.93, 585.x, 586, V42.0, V45.1 V56.x | <ul style="list-style-type: none"> <li>-Hypertensive chronic kidney disease, malignant, with chronic kidney disease stage V or end stage renal disease</li> <li>-Hypertensive chronic kidney disease, benign, with chronic kidney disease stage V or end stage renal disease</li> <li>-Hypertensive chronic kidney disease, unspecified, with chronic kidney disease stage V or end stage renal disease</li> <li>-Hypertensive heart and chronic kidney disease, malignant, without heart failure and with chronic kidney disease stage V or end stage renal disease</li> <li>-Hypertensive heart and chronic kidney disease, malignant, with heart failure and with chronic kidney disease stage V or end stage renal disease</li> <li>-Hypertensive heart and chronic kidney disease, benign, without heart failure and with chronic kidney disease stage V or end stage renal disease</li> <li>-Hypertensive heart and chronic kidney disease, benign, with heart failure and chronic kidney disease stage V or end stage renal disease</li> <li>-Hypertensive heart and chronic kidney disease, unspecified, without heart failure and with chronic kidney disease stage V or end stage renal disease</li> <li>- Hypertensive heart and chronic kidney disease, unspecified, with heart failure and chronic kidney disease stage V or end stage renal disease</li> <li>-Chronic kidney disease</li> <li>-Renal failure, unspecified</li> <li>-Kidney replaced by transplant</li> </ul> |

|  |  |                                                                                                                                                |
|--|--|------------------------------------------------------------------------------------------------------------------------------------------------|
|  |  | <ul style="list-style-type: none"><li>-Postsurgical renal dialysis status</li><li>-Encounter for dialysis and dialysis catheter care</li></ul> |
|--|--|------------------------------------------------------------------------------------------------------------------------------------------------|

**Table II. Risk of Stroke Associated with High Risk Score, Using Different Score Cutoffs**

| <b>High Risk Score Stratum</b> | <b>Odds Ratio (95% CI*) Associated with High Risk Score (AUC**)</b> |
|--------------------------------|---------------------------------------------------------------------|
| 5 - 10                         | 3.43 (2.84, 4.13) (AUC = 0.58)                                      |
| 6 - 10                         | 4.20 (3.31, 5.32) (AUC = 0.55)                                      |
| 7 - 10                         | 4.52 (3.20, 6.37) (AUC = 0.52)                                      |
| 8 - 10                         | 5.84 (3.58, 9.52) (AUC = 0.51)                                      |

\* CI indicates Confidence Interval

\*\* AUC indicates area under the Receiver Operating Characteristic curve for model sensitivity analysis.

**Table III. Risk Factors for Ischemic Stroke after Sepsis or Bloodstream Infection**

| <b>Risk of Ischemic Stroke within a Year of Hospitalization for Sepsis or Bloodstream infection</b> |                            |
|-----------------------------------------------------------------------------------------------------|----------------------------|
| <b>Predictors</b>                                                                                   | <b>Odds Ratio (95% CI)</b> |
| Age greater than 45 years old                                                                       | 2.19 (1.45, 3.30)          |
| Valvar Diseases                                                                                     | 1.73 (1.30, 2.29)          |
| Coagulopathy                                                                                        | 2.90 (2.36, 3.56)          |
| Hypertension                                                                                        | 1.09 (0.88, 1.34)          |
| Peripheral Vascular Disorder                                                                        | 1.74 (1.36, 2.23)          |
| Pulmonary Circulation Disorders                                                                     | 1.61 (1.12, 2.30)          |
| Renal Failure                                                                                       | 1.43 (1.17, 1.74)          |
| Rheumatoid Arthritis/Collagen Vascular Diseases                                                     | 1.63 (1.10, 2.40)          |

**Table IV. Risk Factors for Hemorrhagic Stroke after Sepsis or Bloodstream Infection**

| <b>Risk of Hemorrhagic Stroke within a Year of Hospitalization for Sepsis or Bloodstream infection</b> |                            |
|--------------------------------------------------------------------------------------------------------|----------------------------|
| <b>Predictors</b>                                                                                      | <b>Odds Ratio (95% CI)</b> |
| Age greater than 65 years old                                                                          | 0.46 (0.31, 0.69)          |
| Lymphoma                                                                                               | 2.27 (0.99, 5.21)          |
| Coagulopathy                                                                                           | 6.71 (4.62, 9.76)          |
| Congestive Heart Failure                                                                               | 1.71 (1.11, 2.63)          |
| Pulmonary Circulation Disorders                                                                        | 2.82 (1.58, 5.02)          |

\* CI indicates Confidence Interval
